**Obaid, A. L., Nelson, M. E., Lindstrom, J. and Salzberg, B. M.** (2005). Optical studies of nicotinic acetylcholine receptor subtypes in the guinea-pig enteric nervous system. *J. Exp. Biol.* **208**, 2981-3001.

In the original published on-line version of this paper, the acceptance date was incorrect. It should have read 2 June 2005. The error has been rectified and the current on-line version and print versions are correct.

We apologise to authors and readers for any inconvenience this may have caused.
